# Supplementary material
Source: MDPI journal article supplement (https://www.mdpi.com/2075-163X/13/11/1398)
Supplement: s1 [file s1 › minerals-2649341-supplementary.pdf]

## Supporting Information for

The Role of Mg Doping in Manipulating the Adsorption Mechanisms of CaAl-Layered Double Hydroxide: Investigating the Effects of Calcination Temperature and Borate Concentration Changes

Shuang Xu<sup>1</sup>, Binling Guo<sup>2,3</sup>, Keiko Sasaki<sup>4</sup>, Xinhong Qiu<sup>1,5\*</sup>

*<sup>1</sup>School of Chemistry and Environmental Engineering, Wuhan Institute of Technology, Wuhan, 430205, China*

*<sup>2</sup>School of Civil Engineering, Hefei University of Technology, Hefei 230009, China*

*<sup>3</sup>Engineering Research Center of Low-carbon Technology and Equipment for Cement-based Materials, Ministry of Education, Hefei 230009, China*

*<sup>4</sup>Department of Earth Resources Engineering, Kyushu University, Fukuoka, 8190395, Japan*

*<sup>5</sup>Hubei Environmental Engineering Technology Research Center for Chemical Engineering Pollution Control, Wuhan, China*

## Test S1. Preparation of LDHs and calcined LDHs

Magnesium nitrate hexahydrate ( $\text{Mg}(\text{NO}_3)_2 \cdot 6\text{H}_2\text{O}$ ), calcium nitrate tetrahydrate ( $\text{Ca}(\text{NO}_3)_2 \cdot 4\text{H}_2\text{O}$ ), aluminum nitrate nonahydrate ( $\text{Al}(\text{NO}_3)_3 \cdot 9\text{H}_2\text{O}$ ), boric acid ( $\text{H}_3\text{BO}_3$ ), sodium nitrate ( $\text{NaNO}_3$ ) and sodium hydroxide ( $\text{NaOH}$ ) were obtained from Sinopharm Chemical Reagent Co. Ltd. All chemicals are of analytical reagent and used without purification.

Hydrothermal coprecipitation methods were used for the synthesis of CaAl-LDH and  $\text{Mg}^{2+}$ -doped CaAl-LDH. For CaAl-LDH,  $\text{Ca}(\text{NO}_3)_2 \cdot 4\text{H}_2\text{O}$  (2.36 g) and  $\text{Al}(\text{NO}_3)_3 \cdot 9\text{H}_2\text{O}$  (1.86 g) (molar ratio Ca:Al = 2:1) were added to 50 mL of 0.50 mol/L  $\text{NaNO}_3$ . Adjust the pH to 12.0 by 2 mol/L  $\text{NaOH}$ . Then, the resulting slurry was transferred into a Teflon vessel and then sealed with a metal shell, placed in a constant-temperature oven at 100°C for 36 h. The cooled slurry was separated by centrifugation at 9000 rpm for 5 min., then washed using deionized water and ethanol to neutralize them, and dried in 50°C oven. The resulting product was called as CaAl-LDH. CaMgAl-LDH was prepared in the same method. The only difference was that the mixed solution containing  $\text{Mg}^{2+}$  ions with the molar ratio of Ca:Mg:Al = 1.6:0.4:1.0.

## Test S2. Characterization

The crystalline phase of the nanoparticles was determined using a D8 Advance X-ray diffractometer (XRD) (Bruker, Germany) employing Cu K $\alpha$  radiation with scanning speed of 2° min<sup>-1</sup> and scanning step of 0.02°. The accelerating voltage and applied current were 30 kV and 20 mA, respectively. The morphologies of adsorbents and solid residues after reaction were observed using a JSM-5510LV scanning electron microscope (SEM) (JEOL, Japan). Thermo-gravimetric analysis (TG-DSC, 2000SA, Billerica, Massachusetts, USA) was performed from room temperature to 1000°C at a heating rate of 10°C/min. Brunauer-Emmett-Teller (BET) surface area measurements were performed with an ASAP-2460 device (Micromeritics, USA). Fourier transform infrared (FTIR) spectra were recorded on a JASCO FTIR spectrometer (FT/IR-670 Plus, Japan).

Extended X-ray absorption fine structure (EXAFS) spectra of the Ca K-edge were collected on BL06 at the Kyushu Synchrotron Light Research Center (SAGA-LS, Tosu, Japan). The spectra of the samples were collected using a silica drift in fluorescence mode. The photon energy was scanned in the range of 3.7-5.6 keV for the Ca K-edge. The samples were mixed with boron nitride (BN) and pressed into pellets. All of the spectra were averaged and normalized using IFFEFIT software version 1.2.11 [1].

- [1] B. Ravel, M. Newville, ATHENA , ARTEMIS , HEPHAESTUS : data analysis for X-ray absorption spectroscopy using IFEFFIT, (2005) 537–541. <https://doi.org/10.1107/S0909049505012719>.

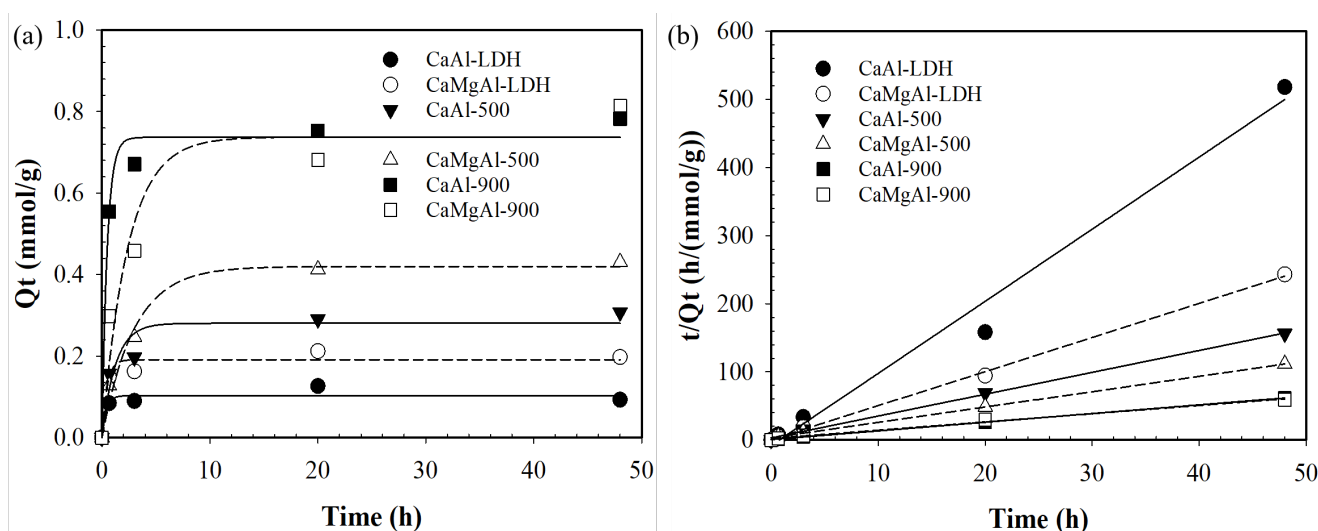

Figure S1. Adsorption kinetics of borate by CaAl-LDH and CaMgAl-LDH with different calcination temperatures. (a) Pseudo-first-order kinetic mode (b) Pseudo-second-order kinetic mode.

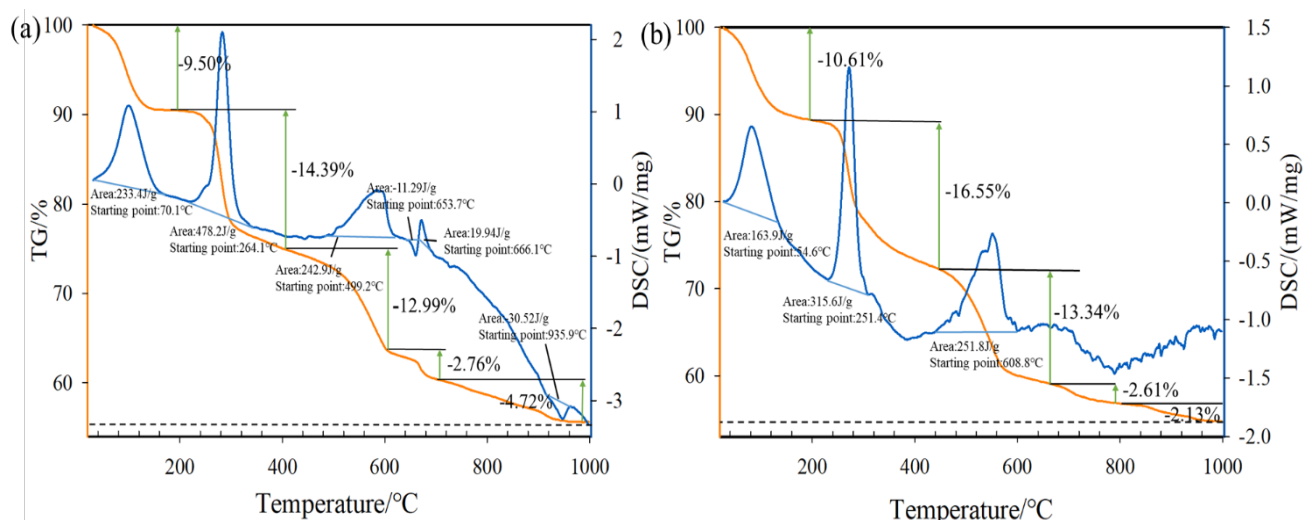

Figure S2. TG/DSC results of (a) CaAl-LDH and (b) CaMgAl-LDH. Reaction temperature is from room temperature to 1000°C.

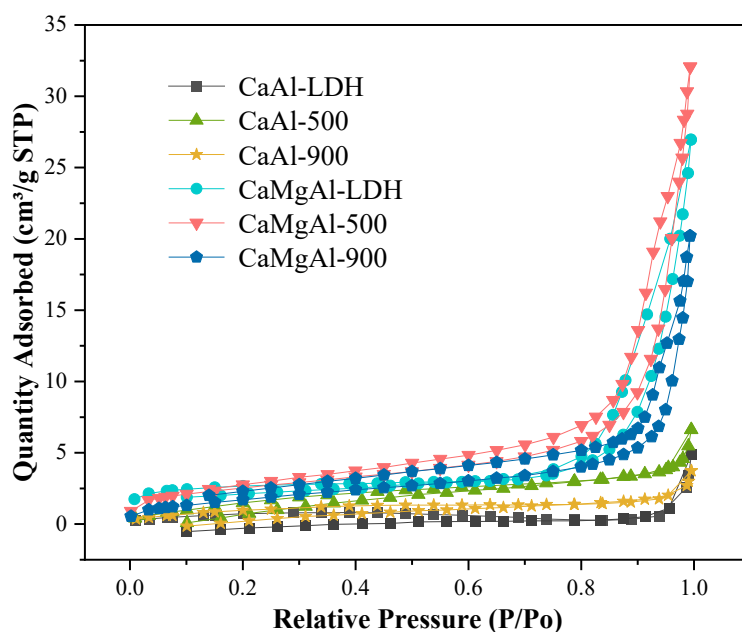

Figure S3. N<sub>2</sub> adsorption-desorption isotherms of all adsorbents.

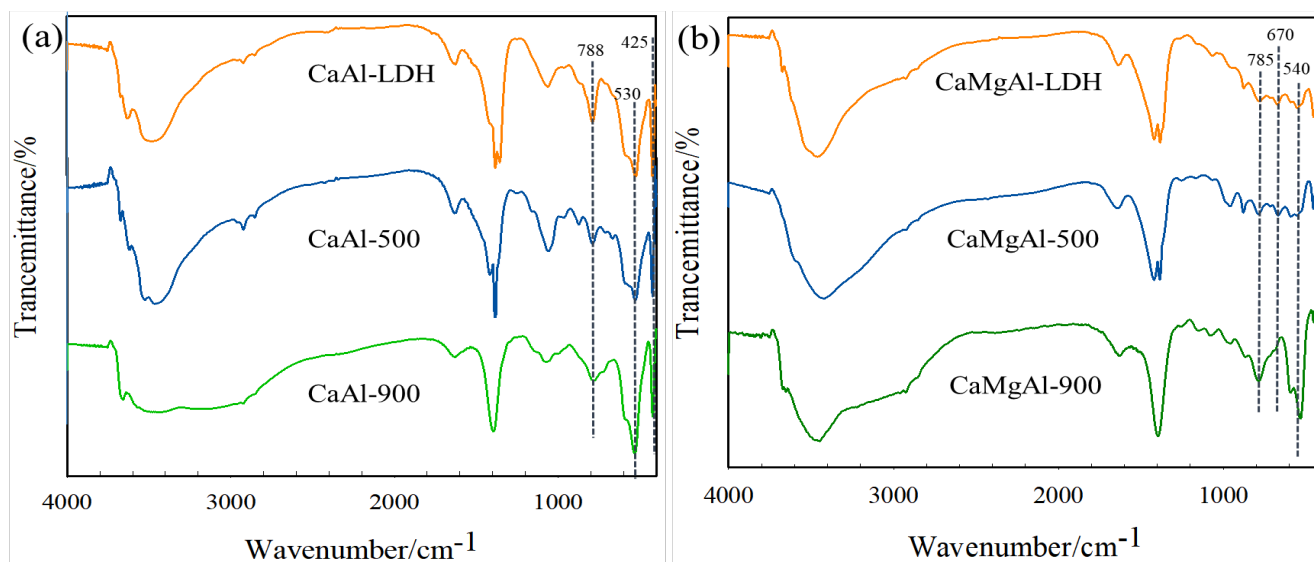

Figure S4. FTIR spectra of solid residues after adsorption of 2.5 mM borate on CaAl-LDH and CaMgAl-LDH with different calcination temperatures.

Table S1. Surface properties of different adsorbents.

| Sample     | $S_{\text{BET}}$ ( $\text{m}^2/\text{g}$ ) | t-MA ( $\text{m}^2/\text{g}$ ) | t-ESA ( $\text{m}^2/\text{g}$ ) | V ( $\text{cm}^3/\text{g}$ ) | $D_a$ (nm) | $D_b$ (nm) |
|------------|--------------------------------------------|--------------------------------|---------------------------------|------------------------------|------------|------------|
| CaAl-LDH   | 2.67                                       | 1.35                           | 1.32                            | 0.0075                       | 12.49      | 11.04      |
| CaAl-500   | 6.11                                       | 0.28                           | 5.83                            | 0.010                        | 5.16       | 4.56       |
| CaAl-900   | 3.69                                       | 0.56                           | 3.13                            | 0.0057                       | 6.03       | 4.69       |
| CaMgAl-LDH | 9.80                                       | 7.86                           | 1.94                            | 0.042                        | 29.22      | 17.50      |
| CaMgAl-500 | 7.36                                       | 0.21                           | 7.15                            | 0.050                        | 23.17      | 19.16      |
| CaMgAl-900 | 6.51                                       | 0.06                           | 6.45                            | 0.031                        | 17.92      | 15.04      |

Note:  $S_{\text{BET}}$  is the BET surface area, t-MA is the t-plot Micropore area, t-ESA is the t-Plot external surface area, V is the total pore volume, and  $D_a$  and  $D_d$  are the Barrett-Joyner-Halenda (BJH) pore size calculated from the adsorption and desorption branches.
